# Supplementary material
Source: publisher figshare collection journal article supplement (https://aacr.figshare.com/articles/dataset/_/22488954)
Supplement: Supplementary file 1 [file 39940575]

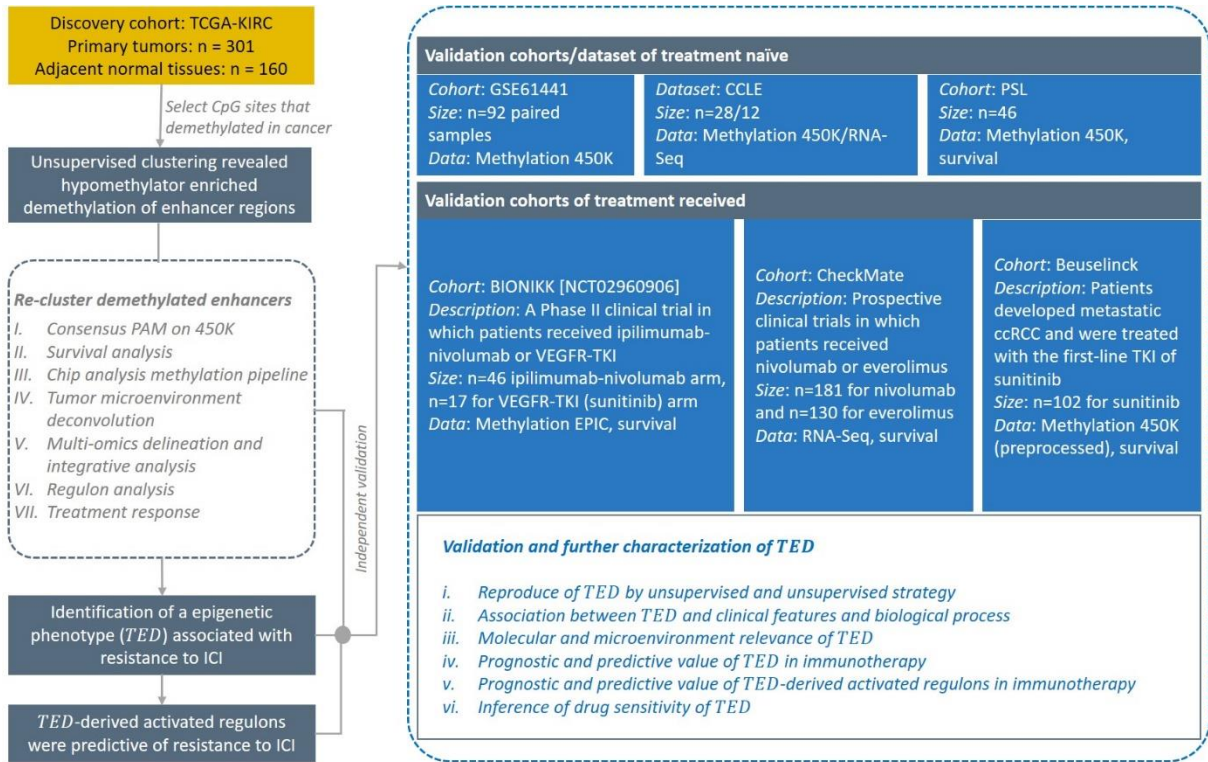

**Figure S1.** Flow chart of the study. A total of six ccRCC cohorts and one cell line dataset were used in this study.
